# Supplementary material
Source: PubMed Central journal article supplement (PMC10130950)
Supplement: jama-e232296-s002.pdf [file jama-e232296-s002.pdf]

Cohen PA, Avula B, Wang Y-H, Katragunta K, Khan I. Quantity of melatonin and CBD in melatonin gummies sold in the US. *JAMA*. Published April 25, 2023. doi:10.1001/jama.2023.2296

## **Data Sharing Statement**

### **Data**

**Data available:** No
